# Supplementary material for: Interaction of 2,4,6-tris(2-pyrimidyl)-1,3,5-triazine (TPymT) with CoX2(X = Cl, Br) in water: trapping of new self-assembled water–chloride/bromide clusters in a [Co(bpca)2]+host (bpca = bis(2-pyrimidylcarbonyl)amidate anion)
Source: Royal Society of Chemistry journal article supplement (doi:10.1039/c5nj01125f), 2015-01-01
Supplement: c5nj01125f1.pdf [file c5nj01125f1.pdf]

## Electronic Supplementary Information

### Interaction of 2,4,6-tris(2-pyrimidyl)-1,3,5-triazine (TPymT) with $\text{CoX}_2$ ( $\text{X} = \text{Cl}, \text{Br}$ ) in water: Trapping of new self-assembled water-chloride/bromide clusters in a $[\text{Co}(\text{bpca})_2]^+$ host (bpca = bis(2-pyrimidylcarbonyl)amidate anion)

Damir A. Safin, Patrick M. J. Szell, Antonin Keller, Ilia Korobkov, David L. Bryce and Muralee Murugesu\*

Department of Chemistry, University of Ottawa, 10 Marie Curie Private, Ottawa, ON, Canada K1N 6N5. E-mail:  
m.murugesu@uottawa.ca; Fax: +1 (613) 562 5170; Tel: +1 (613) 562 5800 ext. 2733

**Table S1.** Selected bond lengths (Å) and angles (°) for  $[\text{Co}(\text{bpca})_2]\text{Cl}\cdot 7.5\text{H}_2\text{O}$

| <i>Bond lengths</i> |            |                 |            |                 |            |
|---------------------|------------|-----------------|------------|-----------------|------------|
| Co(1)–N(1)          | 1.895(4)   | Co(1)–N(9)      | 1.930(5)   | N(1)–C(1)       | 1.369(7)   |
| Co(1)–N(2)          | 1.929(5)   | O(1)–C(1)       | 1.219(6)   | N(1)–C(6)       | 1.376(7)   |
| Co(1)–N(4)          | 1.947(5)   | O(2)–C(6)       | 1.216(6)   | N(6)–C(11)      | 1.364(8)   |
| Co(1)–N(6)          | 1.890(4)   | O(3)–C(11)      | 1.215(7)   | N(6)–C(16)      | 1.379(7)   |
| Co(1)–N(7)          | 1.940(5)   | O(4)–C(16)      | 1.206(6)   |                 |            |
| <i>Bond angles</i>  |            |                 |            |                 |            |
| N(1)–Co(1)–N(2)     | 83.26(19)  | N(2)–Co(1)–N(4) | 166.18(18) | N(4)–Co(1)–N(7) | 92.25(19)  |
| N(1)–Co(1)–N(4)     | 82.98(19)  | N(2)–Co(1)–N(6) | 98.18(19)  | N(4)–Co(1)–N(9) | 91.29(19)  |
| N(1)–Co(1)–N(6)     | 178.33(19) | N(2)–Co(1)–N(7) | 90.42(19)  | N(6)–Co(1)–N(7) | 83.2(2)    |
| N(1)–Co(1)–N(7)     | 96.0(2)    | N(2)–Co(1)–N(9) | 89.36(18)  | N(6)–Co(1)–N(9) | 83.0(2)    |
| N(1)–Co(1)–N(9)     | 97.91(19)  | N(4)–Co(1)–N(6) | 95.60(19)  | N(7)–Co(1)–N(9) | 165.99(19) |

**Table S2.** Selected bond lengths (Å) and angles (°) for  $[\text{Co}(\text{bpca})_2]\text{Br}\cdot 7.5\text{H}_2\text{O}$

| <i>Bond lengths</i> |            |                 |            |                 |            |
|---------------------|------------|-----------------|------------|-----------------|------------|
| Co(1)–N(1)          | 1.895(2)   | Co(1)–N(9)      | 1.945(3)   | N(1)–C(1)       | 1.368(4)   |
| Co(1)–N(2)          | 1.934(3)   | O(1)–C(1)       | 1.212(4)   | N(1)–C(6)       | 1.377(4)   |
| Co(1)–N(4)          | 1.948(3)   | O(2)–C(6)       | 1.211(4)   | N(6)–C(11)      | 1.367(4)   |
| Co(1)–N(6)          | 1.899(2)   | O(3)–C(11)      | 1.210(4)   | N(6)–C(16)      | 1.369(4)   |
| Co(1)–N(7)          | 1.940(3)   | O(4)–C(16)      | 1.206(4)   |                 |            |
| <i>Bond angles</i>  |            |                 |            |                 |            |
| N(1)–Co(1)–N(2)     | 83.11(10)  | N(2)–Co(1)–N(4) | 166.08(10) | N(4)–Co(1)–N(7) | 91.09(11)  |
| N(1)–Co(1)–N(4)     | 82.99(10)  | N(2)–Co(1)–N(6) | 98.07(11)  | N(4)–Co(1)–N(9) | 92.45(11)  |
| N(1)–Co(1)–N(6)     | 178.62(11) | N(2)–Co(1)–N(7) | 90.05(11)  | N(6)–Co(1)–N(7) | 83.09(11)  |
| N(1)–Co(1)–N(7)     | 97.65(11)  | N(2)–Co(1)–N(9) | 89.72(11)  | N(6)–Co(1)–N(9) | 83.25(11)  |
| N(1)–Co(1)–N(9)     | 96.06(11)  | N(4)–Co(1)–N(6) | 95.84(11)  | N(7)–Co(1)–N(9) | 166.17(11) |

**Table S3.** Hydrogen bond lengths (Å) and angles (°) for [Co(bpca)<sub>2</sub>]Cl·7.5H<sub>2</sub>O and [Co(bpca)<sub>2</sub>]Br·7.5H<sub>2</sub>O

|                                                               | D–H···A                                                       | <i>d</i> (D–H)                   | <i>d</i> (H···A) | <i>d</i> (D···A) | ∠(DHA)   |     |
|---------------------------------------------------------------|---------------------------------------------------------------|----------------------------------|------------------|------------------|----------|-----|
| <b>[Co(bpca)<sub>2</sub>]Cl·7.5H<sub>2</sub>O<sup>a</sup></b> | O(5)–H(5B)···Cl(1)                                            | 0.96                             | 2.25             | 3.208(5)         | 176      |     |
|                                                               | O(5)–H(5C)···Cl(1) <sup>#1</sup>                              | 1.00                             | 2.22             | 3.197(5)         | 165      |     |
|                                                               | O(6)–H(6A)···O(7)                                             | 0.96                             | 1.91             | 2.849(7)         | 166      |     |
|                                                               | O(6)–H(6B)···O(5)                                             | 1.01                             | 1.87             | 2.821(7)         | 157      |     |
|                                                               | O(7)–H(7A)···O(6)                                             | 0.96                             | 2.41             | 2.849(7)         | 107      |     |
|                                                               | O(7)–H(7A)···N(8) <sup>#2</sup>                               | 0.96                             | 2.57             | 3.032(7)         | 110      |     |
|                                                               | O(7)–H(7B)···O(10) <sup>#3</sup>                              | 1.00                             | 2.28             | 2.815(7)         | 112      |     |
|                                                               | O(8)–H(8B)···Cl(1)                                            | 0.96                             | 2.38             | 3.130(6)         | 135      |     |
|                                                               | O(8)–H(8C)···O(9)                                             | 1.00                             | 1.87             | 2.713(8)         | 140      |     |
|                                                               | O(9)–H(9B)···O(11) <sup>#4</sup>                              | 0.96                             | 1.85             | 2.658(7)         | 141      |     |
|                                                               | O(9)–H(9C)···Cl(1) <sup>#5</sup>                              | 1.00                             | 2.29             | 3.114(6)         | 139      |     |
|                                                               | O(10)–H(10B)···O(6)                                           | 0.96                             | 1.90             | 2.812(7)         | 157      |     |
|                                                               | O(10)–H(10C)···O(7) <sup>#3</sup>                             | 1.00                             | 1.94             | 2.815(7)         | 144      |     |
|                                                               | O(11)–H(11B)···O(10) <sup>#6</sup>                            | 1.00                             | 2.34             | 2.878(7)         | 113      |     |
|                                                               | O(12)–H(12A)···N(8)                                           | 0.96                             | 2.41             | 3.182(10)        | 138      |     |
|                                                               | O(12)–H(12B)···O(4) <sup>#2</sup>                             | 1.00                             | 2.04             | 2.948(9)         | 149      |     |
|                                                               | <b>[Co(bpca)<sub>2</sub>]Br·7.5H<sub>2</sub>O<sup>b</sup></b> | O(5)–H(5B)···Br(1)               | 0.96             | 2.39             | 3.338(3) | 172 |
|                                                               |                                                               | O(5)–H(5C)···Br(1) <sup>#1</sup> | 1.00             | 2.35             | 3.307(3) | 159 |
| O(6)–H(6B)···O(5)                                             |                                                               | 0.96                             | 1.94             | 2.816(5)         | 151      |     |
| O(6)–H(6C)···O(10) <sup>#2</sup>                              |                                                               | 1.00                             | 1.84             | 2.824(5)         | 165      |     |
| O(7)–H(7B)···Br(1)                                            |                                                               | 0.96                             | 2.44             | 3.351(4)         | 159      |     |
| O(7)–H(7C)···O(8)                                             |                                                               | 1.00                             | 1.77             | 2.692(12)        | 151      |     |
| O(8)–H(8B)···O(7)                                             |                                                               | 0.96                             | 2.17             | 2.692(12)        | 113      |     |
| O(8)–H(8C)···Br(1) <sup>#3</sup>                              |                                                               | 1.00                             | 2.24             | 3.142(8)         | 148      |     |
| O(9)–H(9B)···O(3) <sup>#2</sup>                               |                                                               | 0.96                             | 2.12             | 2.964(4)         | 146      |     |
| O(9)–H(9C)···O(1) <sup>#3</sup>                               |                                                               | 1.00                             | 2.31             | 2.927(4)         | 118      |     |
| O(9)–H(9C)···O(2) <sup>#3</sup>                               |                                                               | 1.00                             | 2.45             | 3.386(4)         | 154      |     |
| O(10)–H(10B)···N(10)                                          |                                                               | 0.95                             | 2.03             | 2.959(4)         | 164      |     |
| O(10)–H(10C)···O(7) <sup>#2</sup>                             |                                                               | 1.00                             | 1.83             | 2.760(5)         | 153      |     |
| O(11)–H(11A)···O(6) <sup>#4</sup>                             |                                                               | 0.96                             | 1.99             | 2.763(12)        | 136      |     |
| O(11)–H(11B)···O(10)                                          |                                                               | 1.00                             | 2.04             | 2.726(13)        | 123      |     |
| O(11)–H(11C)···O(6) <sup>#4</sup>                             |                                                               | 0.80                             | 1.97             | 2.763(12)        | 172      |     |
| O(11)–H(11D)···O(12)                                          |                                                               | 1.00                             | 1.82             | 2.297(15)        | 105      |     |

<sup>a</sup> Symmetry transformations used to generate equivalent atoms: #1:  $x, 3/2 - y, 1/2 + z$ ; #2:  $1 - x, 2 - y, -z$ ; #3:  $-x, 2 - y, -z$ ; #4:  $x, y, -1 + z$ ; #5:  $x, 3/2 - y, -1/2 + z$ ; #6:  $-x, 2 - y, 1 - z$ .

<sup>b</sup> Symmetry transformations used to generate equivalent atoms: #1:  $x, 1/2 - y, -1/2 + z$ ; #2:  $1 - x, -y, 1 - z$ ; #3:  $x, 1/2 - y, 1/2 + z$ ; #4:  $-1 + x, y, z$ .
